# Supplementary material for: Strategies for Pre-Emptive Mid-Air Collision Avoidance in Budgerigars
Source: PLoS One. 2016 Sep 28;11(9):e0162435. doi: 10.1371/journal.pone.0162435 (PMC5040264; doi:10.1371/journal.pone.0162435)
Supplement: S1 Table — (PDF) [file pone.0162435.s002.pdf]

# S1 Table - Detailed Behavioral Observations

Ingo Schiffner,Tristan Perez, Mandyam V. Srinivasan

Table A. Detailed Behavioural Observations.

| Date     | Bird 1    | Bird 2    | Pair | Trials | Dist.(m) | Above | Same | Below | Left | Center | Right | Proximity score |
|----------|-----------|-----------|------|--------|----------|-------|------|-------|------|--------|-------|-----------------|
| 28/01/14 | Blackhole | Nemo      | 1    | 5      | 10       | 3     | 1    | 1     | 4    | 0      | 1     | 2.60            |
| 28/01/14 | Nemo      | Blackhole | 1    | 4      | 10       | 1     | 1    | 2     | 3    | 1      | 0     | 2.75            |
| 28/01/14 | Drongo    | Four      | 2    | 1      | 10       | 0     | 1    | 0     | 0    | 1      | 0     | 1.00            |
| 28/01/14 | Four      | Drongo    | 2    | 2      | 10       | 0     | 0    | 2     | 0    | 0      | 2     | 2.50            |
| 4/02/14  | Drongo    | Three     | 3    | 5      | 10       | 4     | 0    | 1     | 0    | 3      | 2     | 3.40            |
| 4/02/14  | Three     | Drongo    | 3    | 5      | 10       | 0     | 1    | 4     | 0    | 0      | 5     | 3.40            |
| 28/01/14 | One       | Two       | 4    | 4      | 10       | 0     | 1    | 3     | 0    | 0      | 4     | 3.75            |
| 28/01/14 | Two       | One       | 4    | 5      | 10       | 1     | 1    | 3     | 0    | 0      | 5     | 3.20            |
| 4/02/14  | Four      | Milkyway  | 5    | 5      | 10       | 0     | 1    | 4     | 0    | 2      | 3     | 3.40            |
| 4/02/14  | Milkyway  | Four      | 5    | 5      | 10       | 5     | 0    | 0     | 0    | 2      | 3     | 3.40            |
| 4/02/14  | Nemo      | Three     | 6    | 5      | 10       | 0     | 1    | 4     | 0    | 0      | 5     | 3.20            |
| 4/02/14  | Three     | Nemo      | 6    | 5      | 10       | 5     | 0    | 0     | 0    | 3      | 2     | 3.60            |
| 4/02/14  | Rama      | Titan     | 7    | 2      | 10       | 0     | 0    | 2     | 0    | 2      | 0     | 3.50            |
| 4/02/14  | Titan     | Rama      | 7    | 1      | 10       | 1     | 0    | 0     | 0    | 1      | 0     | 4.00            |
| 7/02/14  | Drongo    | Three     | 3    | 4      | 5        | 3     | 1    | 0     | 0    | 1      | 3     | 4.00            |
| 7/02/14  | Three     | Drongo    | 3    | 5      | 5        | 0     | 0    | 5     | 0    | 0      | 5     | 3.80            |
| 7/02/14  | One       | Two       | 4    | 5      | 5        | 0     | 2    | 3     | 0    | 0      | 5     | 4.00            |
| 7/02/14  | Two       | One       | 4    | 5      | 5        | 4     | 1    | 0     | 0    | 0      | 5     | 3.60            |
| 10/02/14 | Four      | Milkyway  | 5    | 5      | 5        | 2     | 0    | 3     | 2    | 2      | 1     | 2.20            |
| 10/02/14 | Milkyway  | Four      | 5    | 5      | 5        | 4     | 1    | 0     | 1    | 1      | 3     | 3.60            |
| 10/02/14 | Nemo      | Three     | 6    | 4      | 5        | 0     | 2    | 2     | 0    | 2      | 2     | 2.25            |
| 10/02/14 | Three     | Nemo      | 6    | 5      | 5        | 5     | 0    | 0     | 0    | 3      | 2     | 3.20            |
| 10/02/14 | Rama      | Titan     | 7    | 5      | 5        | 1     | 1    | 3     | 1    | 1      | 3     | 3.60            |
| 10/02/14 | Ritan     | Rama      | 7    | 5      | 5        | 1     | 2    | 2     | 0    | 2      | 3     | 3.40            |

This table provides data for each individual bird for each pair and the respective number of Trials during which the birds flew in this specific configuration from the two sets of experiments (releases at 5m and 10m), Shown are also the respective scores for the reference-bird’s preference to fly either above, at the same height or below the other bird, the scores for the reference-bird preference to move to the left, fly along the center or fly to the right, as well as the average proximity score.
